# Supplementary material for: Temporal analysis of the autophagic and apoptotic phenotypes in Leishmania parasites
Source: Microb Cell. 2018 Aug 1;5(9):404–17. doi: 10.15698/mic2018.09.646 (PMC6167523; doi:10.15698/mic2018.09.646)
Supplement: Supplementary file 1 [file mic-05-404-s01.pdf]

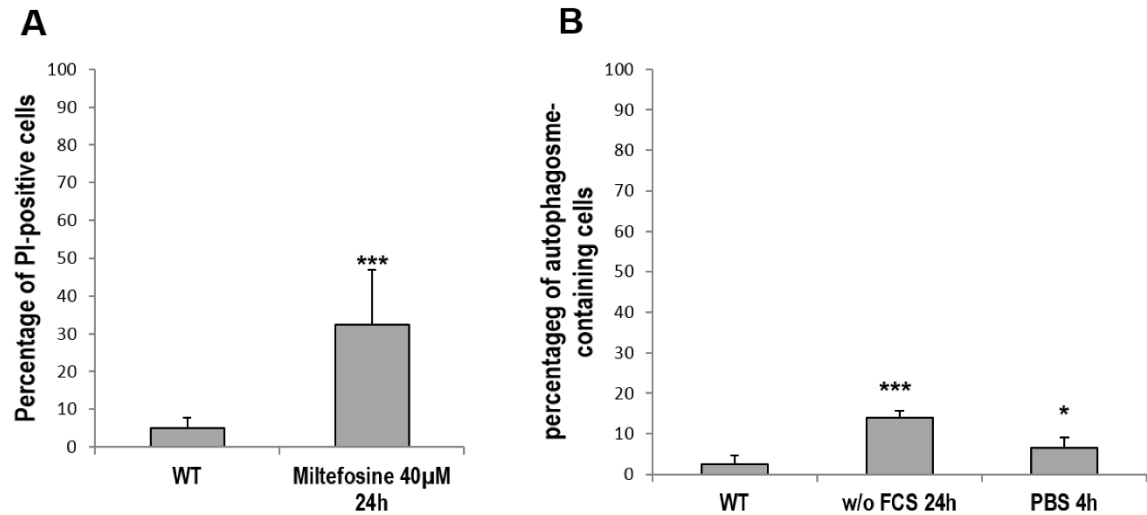

**FIGURE S1: Miltefosine induces *Leishmania* cell death while culture in starvation conditions (without FCS or in PBS) induces autophagy. (A)** Percentage of cells that have lost their plasma membrane integrity (PI-positive cells) in control conditions and after addition of 40μM of miltefosine for 24 h. A minimum of 9 independent experiments were carried out. **(B)** Percentage of autophagosome-containing cells in control conditions and in different starvation conditions (without FCS for 24 h or in PBS for 4 h). A minimum of 1085 cells were counted from four independent experiments. Unpaired t-test: \*  $p < 0.05$ , \*\*\*  $p < 0.001$ .

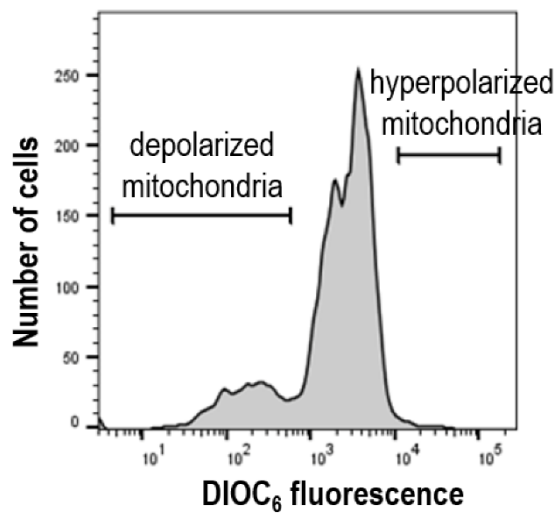

**FIGURE S2: Raw histogram showing how the percentage of cells with depolarized and hyperpolarized mitochondrion was quantified by flow cytometry.**

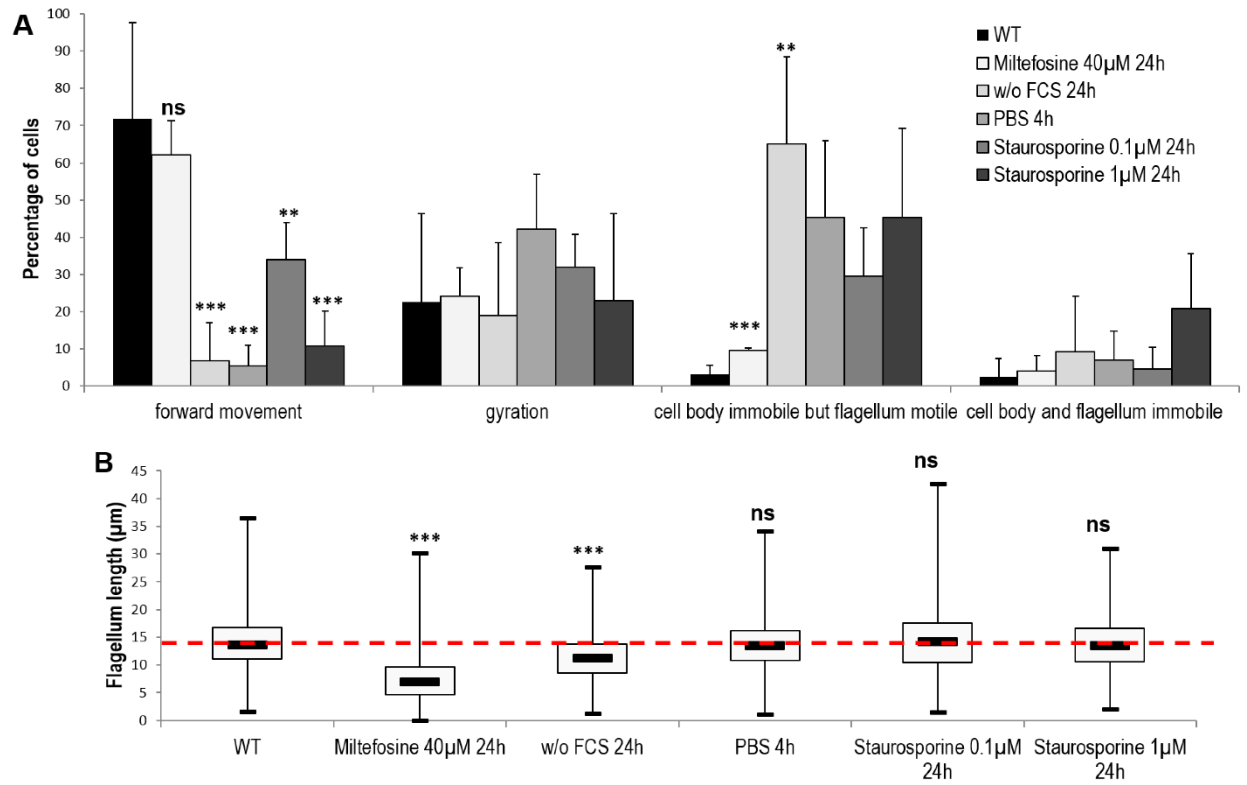

**FIGURE S3: Mobility during *Leishmania* death and autophagy. (A)** Trajectory of cells in different culture conditions. A minimum of 69 cells were counted for each condition from a minimum of three independent experiments. **(B)** Box plots representing flagellum length of cells. A minimum of 320 cells were counted for each condition from a minimum of three independent experiments. Unpaired t-test: ns not significant, \*\*:  $p < 0.01$ , \*\*\*:  $p < 0.001$ .

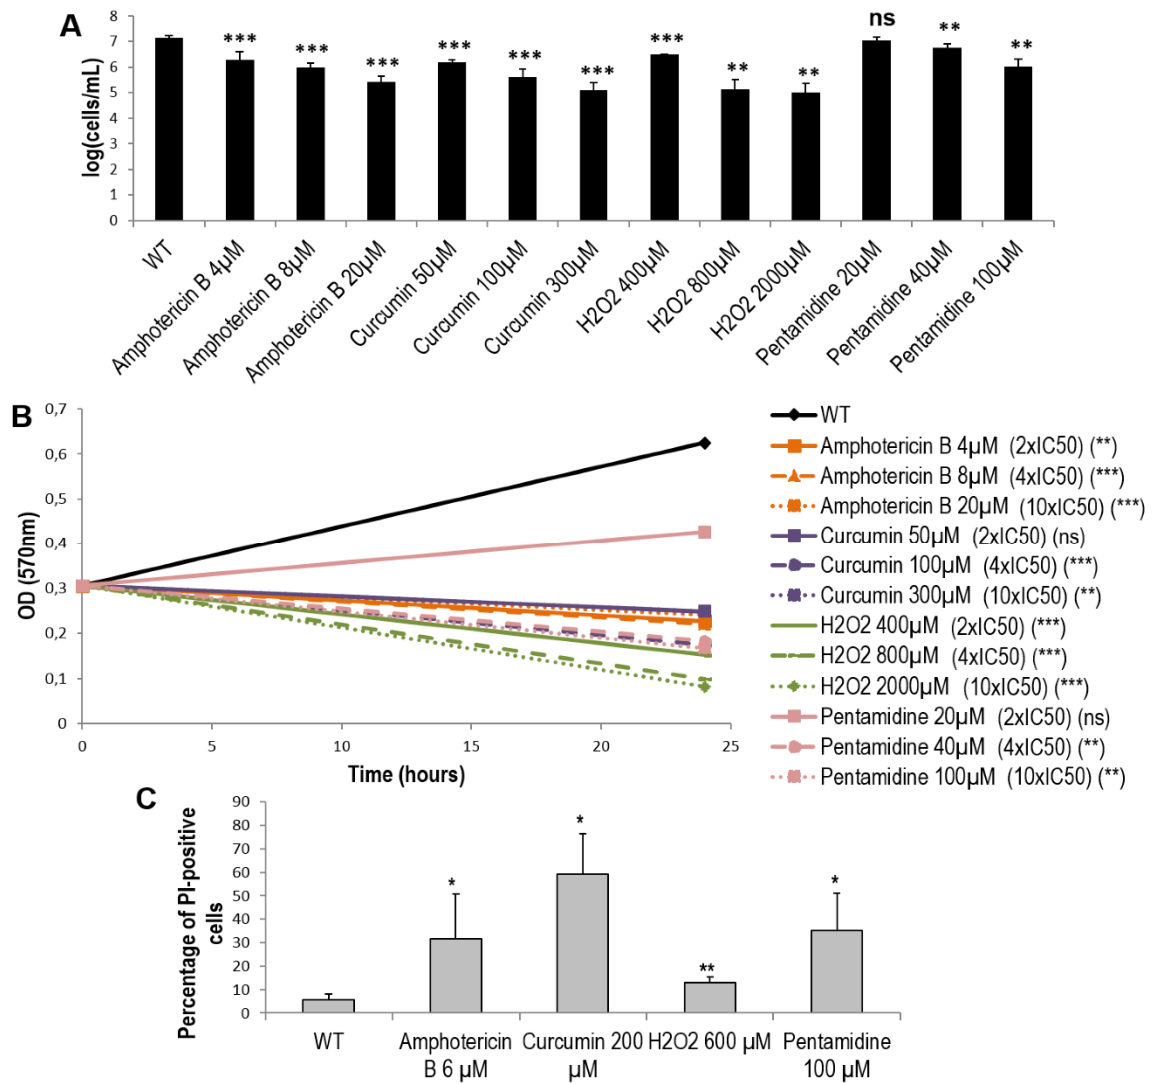

**FIGURE S4: Amphotericin B, curcumin, H<sub>2</sub>O<sub>2</sub> and pentamidine induce *Leishmania* cell death. (A)** Cell concentration after culture for 24 h with amphotericin B, curcumin, H<sub>2</sub>O<sub>2</sub> and pentamidine. All molecules induced cell growth inhibition at all concentrations tested, with the exception of pentamidine at 20 μM. Mean ± SD from a minimum of three independent experiments. Unpaired t-test between the condition of interest at 24 h and the control condition (WT) at 24 h. **(B)** Optical density, after the addition of MTT, of cells cultivated with various concentrations of amphotericin B, curcumin, H<sub>2</sub>O<sub>2</sub> and pentamidine. All molecules were cytotoxic. A minimum of three independent experiments were carried out. Unpaired t-test between the condition of interest at 24 h and the same condition at 0 h. **(C)** Percentage of PI-positive cells after culture for 24 h with different molecules. The significant increase indicates loss of plasma membrane integrity, a feature of cell death. Unpaired t-test (compared to WT). ns not significant, \* p < 0.05, \*\* p < 0.01, \*\*\* p < 0.001.

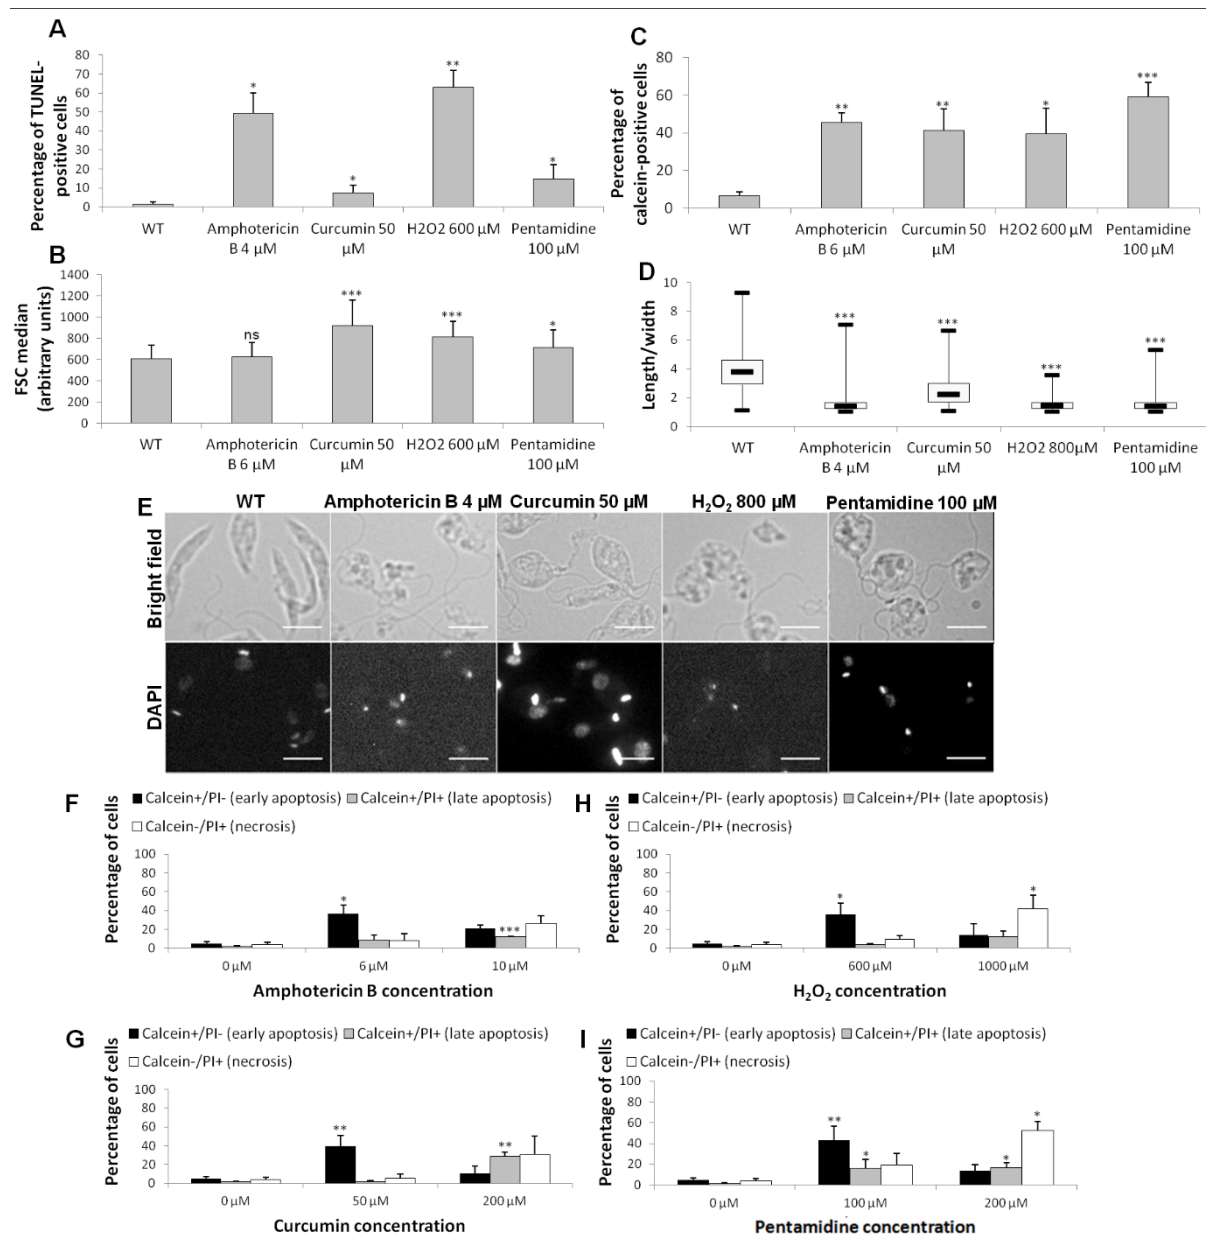

**FIGURE S5: Amphotericin B, curcumin, H<sub>2</sub>O<sub>2</sub> and pentamidine induce *Leishmania* apoptosis.** (A) Percentage of TUNEL-positive cells after treatment for 24 h with amphotericin B, curcumin, H<sub>2</sub>O<sub>2</sub> and pentamidine. The significant increase after the addition of the different molecules indicates DNA fragmentation. A minimum of 588 cells were counted from a minimum of three independent experiments. (B) FSC median assessed by flow cytometry of cells cultivated with various molecules. The increase in FSC median, observed with all molecules with the exception of amphotericin B at 4  $\mu$ M, is indicative of cell shrinkage. Mean  $\pm$  SD from a minimum of fourteen independent experiments. (C) Percentage of calcein-positive cells when culturing *L. major* cells with various molecules for 24 h ( $\geq$  three independent experiments). (D) Box plots representing length-to-width ratio of cells cultivated with different molecules. A significant rounding up was observed after the addition of all molecules for 24 h. A minimum of 527 cells were counted for each condition, from a minimum of three independent experiments. The thick line inside each box represents the median value; the lower and upper edge of each box indicates the 25<sup>th</sup> and 75<sup>th</sup> percentiles, respectively; the lower and upper whiskers (ends of the box arms) represent the minimum and maximum, respectively. (E) Microscopical observation of cells treated for 24 h with amphotericin B, curcumin, H<sub>2</sub>O<sub>2</sub> or pentamidine and stained with DAPI, highlighting cell rounding up (bar = 5  $\mu$ m). (F-I) Percentage of cells in early apoptosis (calcein+/PI-), in late apoptosis (calcein+/PI+) and in necrosis (calcein-/PI+) after treatment with various concentrations of amphotericin B (F), curcumin (G), H<sub>2</sub>O<sub>2</sub> (H) or pentamidine (I). A switch from early apoptosis to late apoptosis/necrosis was observed when the concentration of all molecules was increased. A minimum of two independent experiments was carried out for each concentration. Unpaired t-test; ns not significant, \*  $p < 0.05$ , \*\*  $p < 0.01$  and \*\*\*  $p < 0.001$ .
